# Supplementary material for: A phospha-oseltamivir–biotin conjugate as a strong and selective adhesive for the influenza virus
Source: Bioorg Med Chem Lett. 2014 Apr 1;24(7):1805–7. doi: 10.1016/j.bmcl.2014.02.021 (PMC3988921; doi:10.1016/j.bmcl.2014.02.021)

## **Syntheses and analyses of conjugates 1 and 4**

### **General**

Where anhydrous solvents were required for reactions, MeOH and DMF were purchased (anhydrous) and used as received. DCM was doubly distilled (over CaH<sub>2</sub>) before use and THF was obtained anhydrous and was used without further drying. All other solvents were dried using appropriate drying reagents. Fine chemicals were purchased from Aldrich-, Sigma- or Acros-Chemicals and were of the highest purity available. Reactions were monitored via thin layer chromatography (TLC) using pre-coated silica sheets with fluorescent indicator UV<sub>254</sub>. Compound detection was achieved by UV absorption and by developing plates by staining with a molybdenum phosphate reagent (20 g ammonium molybdate and 0.4 g cerium<sup>(IV)</sup> sulfate in 400 mL of 10% aqueous sulphuric acid) with subsequent heating.

Chromatographic purification was performed using silica gel 60A 'Davisil' (particle size 35-70µm) from Fisher Scientific, UK and silica gel 100 C18 reversed phase (particle size 40-63µm from Fluka Analytical, UK. Silica-based MPLC chromatography was carried out on the Büchi Sepacore system equipped with glass columns packed with LiChroprep Si 60 (15-25µm) from Merck, Darmstadt, Germany. Solvents for chromatography were used as received except for toluene and ethyl acetate, which were distilled before use. Gel permeation chromatography was carried out in the 1-10 mg scale on a XK 16/70 column (bed volume 130 mL), from Amersham packed with Sephadex G-10 (particle size 40-120µm) and 0.1 M NH<sub>4</sub>HCO<sub>3</sub> as buffer. Detection was achieved using a differential refractometer from Knauer, Berlin, Germany.

<sup>1</sup>H NMR, <sup>13</sup>C NMR, <sup>31</sup>P NMR and all multidimensional spectra were recorded on Varian VNMRs spectrometers (600 MHz, 500 MHz or 400 MHz). Chemical shifts in <sup>1</sup>H and <sup>13</sup>C NMR spectra were referenced to the residual proton resonance of the respective deuterated solvents, CDCl<sub>3</sub> (7.26 ppm), D<sub>2</sub>O (4.80 ppm) and CD<sub>3</sub>OD (3.31 ppm) respectively. For <sup>31</sup>P NMR spectra H<sub>3</sub>PO<sub>4</sub> was used as external standard (0 ppm).

HR-ESI-MS spectra were recorded on a Bruker Daltonics Apex III in positive mode with MeOH and/or H<sub>2</sub>O as solvent. Where possible, HR-ESI-MS has been used to characterise compounds which have been synthesised.

### **Target compound phospha-oseltamivir-biotin conjugate 1**

Under an atmosphere of dry nitrogen, protected biotin-conjugate **4** (26 mg, 0.019 mmol) was dissolved in THF (1.5 mL), NEt<sub>3</sub> (0.37 mL, 0.27 mmol) and thiophenol (0.016 mL, 0.133 mmol) were added and the mixture was stirred for 48 h at room temperature. The same amounts of NEt<sub>3</sub> and thiophenol were added and stirring was continued for another 24 h when tlc indicated completion of the reaction. The solvents and reagents were removed *in vacuo* and the resulting crude product was taken up in water (2 mL), sonicated and filtered. The demethylated intermediate was purified by gel

permeation chromatography (0.1 M  $\text{NH}_4\text{HCO}_3$ ) as detailed in ref. 6, and the resulting 13 mg (51%) were stirred in a solution of TFA/ $\text{H}_2\text{O}$  (1:1) (1 mL) overnight. The solvent was then evaporated *in vacuo* and the residue was purified again by gel permeation chromatography (0.1 M  $\text{NH}_4\text{HCO}_3$ ) to afford target compound **1** (8 mg, 66%).

$^1\text{H}$  NMR (600 MHz,  $\text{D}_2\text{O}$ )  $\delta_{\text{H}}$ : 0.89 – 1.00 (6 H, m,  $-\text{OCH}(\text{CH}_2\text{CH}_3)_2$ ), 1.42 – 1.76 (18 H, bm,  $-\text{OCH}(\text{CH}_2\text{CH}_3)_2$ ,  $-\text{C}(\text{O})\text{CH}_2\text{CH}_2\text{CH}_2\text{CH}_2-$ ,  $-\text{OCH}_2\text{CH}_2\text{CH}_2\text{CH}_2\text{CH}_2\text{CH}_2\text{NH}-$ ), 2.13 (3 H, s,  $-\text{NHCOCH}_3$ ), 2.27, (2 H, m,  $-\text{C}(\text{O})\text{CH}_2-$ ), 2.48, 2.59 (2 H, m,  $\text{H}_{6\text{ax}}$ ,  $\text{H}_{6\text{eq}}$ ), 2.85, 3.02 (2 H, d, dd,  $J = 13.1$  Hz,  $J = 5.0$ , 13.2 Hz,  $-\text{S}-\text{CH}_2-$ ), 3.25 (1H,  $\text{OCH}(\text{CH}_2\text{CH}_3)_2$ , 3.42-3.45 (3 H,  $-\text{CH}_2\text{CH}_2\text{NH}-$ ,  $-\text{S}-\text{CH}_2-$ ), 3.66 – 3.72 (4 H, m,  $-\text{OCH}_2\text{CH}_2\text{NHCO}-$ ,  $\text{NHCOCH}_2\text{CH}_2\text{O}-$ ), 3.74-3.77 (44H,  $-\text{O}(\text{CH}_2\text{CH}_2)_{11}\text{O}-$ ), 3.79-3.90 (6H, m,  $-\text{OCH}_2\text{CH}_2\text{NHCO}-$ ,  $-\text{NHCOCH}_2\text{CH}_2\text{O}-$ ,  $\text{H}_4$ ,  $\text{H}_5$ ), 3.98 (1H, m,  $\text{H}_3$ ), 4.27 (2 H, m,  $-\text{OCH}_2\text{CH}_2-$ ), 4.49 (1 H, m,  $-\text{S}-\text{CH}-\text{CH}-\text{NHCO}-$ ), 4.67 (1 H,  $-\text{S}-\text{CH}_2-\text{CH}-\text{NHCO}-$ ), 6.37 (1 H, d,  $J_{\text{P-2}} = 19.06$  Hz,  $\text{H}_2$ ).

$^{13}\text{C}$  NMR (150.8 MHz,  $\text{D}_2\text{O}$ )  $\delta_{\text{C}}$ : 8.93, 9.01 ( $-\text{OCH}(\text{CH}_2\text{CH}_3)_2$ ), 22.72 ( $-\text{NHCOCH}_3$ ), 25.12, 25.52, 25.59, 25.94, 26.12, 28.07, 28.25, 28.59, (3 biotin-C,  $-\text{OCH}_2\text{CH}_2\text{CH}_2\text{CH}_2-\text{CH}_2\text{CH}_2\text{NH}-$ ,  $-\text{OCH}(\text{CH}_2\text{CH}_3)_2$ ), 30.26 ( $-\text{OCH}_2\text{CH}_2-$ ), 35.83 (C-biotin), 36.51 ( $\text{C}_6$ ), 39.63 (2 C-biotin), 49.6 (d,  $\text{C}_5$ ), 53.52 ( $\text{C}_4$ ), 55.73, 60.62, 62.45 (3C-biotin), 65.68, 67.23, 68.31, 69.26, 69.65, 69.79, 69.88, 70.03 ( $-\text{OCH}_2\text{CH}_2\text{O}-$ ,  $\text{OCH}_2\text{CH}_2\text{NHCO}-$ ,  $\text{POCH}_2-$ ,  $-\text{NHCOCH}_2\text{CH}_2-$ ), 76.28 ( $\text{C}_3$ ), 84.51 ( $-\text{OCH}(\text{CH}_2\text{CH}_3)_2$ ), 130.0 ( $\text{C}_1$ ), 136.45 ( $\text{C}_2$ ), 166.68 ( $-\text{NH}-\text{C}(\text{O})-\text{NH}-$ ), 175.12 ( $-\text{NHCOCH}_3$ ), 175.53 ( $-\text{CH}_2-\text{C}(\text{O})\text{NH}-\text{CH}_2-$ ), 177.25 ( $-\text{NHCOCH}_2\text{CH}_2$ ).

$^{31}\text{P}$  NMR (242.7 MHz,  $\text{MeOH}-\text{D}_4$ )  $\delta_{\text{P}}$ : 13.13 (s).

HR-ESI-MS ( $m/z$ ) calculated for  $\text{C}_{56}\text{H}_{105}\text{N}_6\text{O}_{20}\text{PS}$   $[\text{M}+\text{H}]^+$  1246.65, found 1246.6960.

#### Protected phospho-oseltamivir-biotin conjugate **4**

Under an atmosphere of dry nitrogen, azide **3**<sup>6</sup> (29 mg, 0.052 mmol) was dissolved in dry THF (1 mL) and  $\text{PMe}_3$  (1 M stock solution in THF, 68  $\mu\text{L}$ ) was added dropwise with stirring. When tlc indicated the absence of starting material (~ 4h), the reaction was quenched with deionised water (0.5 mL) and the mixture was stirred for an additional 30 minutes. The solvent was then removed *in vacuo* and the crude product was placed on a short silica plug (DCM/MeOH; 10:1 +3%  $\text{NEt}_3$ ) to give the respective amine without additional purification. d-Biotin (51 mg, 0.060 mmol) and PyBOP (32 mg, 0.062 mmol) were dried *in vacuo* and then placed under an  $\text{N}_2$  (g) atmosphere. Dry DMF (1 mL) was then added followed by DIPEA (16  $\mu\text{L}$ , 0.0974 mmol). The reaction flask was then sonicated briefly and cooled to 0 °C (ice-bath). After a few minutes the isolated amino-conjugate (23 mg, 0.0487 mmol) was dissolved in dry DMF (1 mL) and was added dropwise to the stirring d-Biotin solution. The solution was allowed to warm slowly to room temperature overnight after which time TLC indicated the reaction was complete. The solvent was evaporated *in vacuo* and then purified by flash

chromatography (EA/MeOH; 1:2 + 2% AcOH) to give protected target compound **4** (46 mg, 56%).  $R_f$ : 0.4 (EA/MeOH; 1:2 + 2% AcOH).

$^1\text{H}$  NMR (500 MHz, MeOH- $d_4$ )  $\delta_H$ : 0.84, 0.96 (6 H, 2t,  $J = 7.4$  Hz,  $-\text{OCH}(\text{CH}_2\text{CH}_3)_2$ ), 1.43 (9 H, s,  $-\text{NHCOC}(\text{CH}_3)_3$ ), 1.34 – 1.78 (18 H, bm,  $-\text{OCH}(\text{CH}_2\text{CH}_3)_2$ ,  $-\text{C}(\text{O})\text{CH}_2-\text{CH}_2-\text{CH}_2-\text{CH}_2-$ ,  $-\text{OCH}_2\text{CH}_2-\text{CH}_2\text{CH}_2-\text{CH}_2\text{CH}_2\text{NH}-$ ), 1.92 (3 H, s,  $-\text{NHCOCH}_3$ ), 2.24 (2 H, dd,  $J = 6.4$  Hz,  $-\text{C}(\text{O})\text{CH}_2-$ ), 2.24 (1 H, m,  $\text{H}_{6\text{ax}}$ ), 2.51 (1 H, m,  $\text{H}_{6\text{eq}}$ ), 2.72, 2.93 (2 H, d, dd,  $J = 12.7, 4.7, 12.6$  Hz,  $-\text{S}-\text{CH}_2-$ ), 3.16-3.24 (3 H, m,  $-\text{CH}_2\text{CH}_2\text{NH}-$ ,  $-\text{S}-\text{CH}_2-$ ), 3.41 (1 H, m,  $-\text{OCH}(\text{CH}_2\text{CH}_3)_2$ ), 3.55 (4H, m,  $-\text{OCH}_2\text{CH}_2\text{NHCO}-$ ,  $-\text{NHCOCH}_2\text{CH}_2\text{O}-$ ), 3.63-3.66 (m, 47H,  $-\text{OCH}_2\text{CH}_2\text{O}-$ ,  $\text{P}(\text{O})\text{OCH}_3$ ), 3.72 – 3.74 (5 H, m,  $-\text{OCH}_2\text{CH}_2\text{NHCO}-$ ,  $-\text{NHCOCH}_2\text{CH}_2\text{O}-$ ,  $\text{H}_5$ ), 3.86 (1 H, m,  $\text{H}_4$ ), 4.00 – 4.14 (3 H, m,  $-\text{OCH}_2\text{CH}_2-$ ,  $\text{H}_3$ ), 4.31 (1 H, dd,  $J = 4.3, 7.4$  Hz,  $-\text{S}-\text{CH}-\text{CH}-\text{NHCO}-$ ), 4.51 (1 H, dd,  $J = 5.8, 6.0$  Hz,  $-\text{S}-\text{CH}_2-\text{CH}-\text{NHCO}-$ ), 6.57 (1 H, d,  $J_{\text{P-2}} = 22.0$  Hz,  $\text{H}_2$ ).

$^{13}\text{C}$  NMR (151 MHz, MeOH- $d_4$ )  $\delta_C$ : 9.71, 10.02 ( $-\text{OCH}(\text{CH}_2\text{CH}_3)_2$ ), 23.05 ( $-\text{NHCOCH}_3$ ), 26.43, 26.86, 26.93, 29.60, 29.86, 30.37 ( $\text{C}(\text{O})\text{CH}_2-\text{CH}_2-\text{CH}_2-\text{CH}_2-$ ,  $-\text{OCH}_2\text{CH}_2-\text{CH}_2\text{CH}_2-\text{CH}_2\text{CH}_2\text{NH}-$ ), 27.36, 27.53 ( $-\text{OCH}(\text{CH}_2\text{CH}_3)_2$ ), 28.81 ( $-\text{NHCOC}(\text{CH}_3)_2$ ), ~31.4 (d,  $J = 5.9$  Hz,  $-\text{OCH}_2\text{CH}_2-$ ), 32.1, 36.86, 40.23 ( $-\text{CH}_2\text{CH}_2\text{NH}-$ , biotin-C,  $\text{C}_6$ ), 41.07 (biotin-C), 50.4 ( $\text{C}_5$ ), 53.4 (d,  $J = 5.8$  Hz,  $-\text{P}(\text{OCH}_3)_2$ ), 56.60 (m,  $\text{C}_4$ ), 57.08, 61.70, 63.45 (biotin-C), 67.84, 68.29, 70.68, 71.39, 71.41, 71.51, 71.56, 71.62, 71.64 ( $-\text{OCH}_2\text{CH}_2\text{O}-$ ,  $-\text{OCH}_2\text{CH}_2\text{NH}-$ ,  $-\text{POCH}_2-$ ,  $-\text{NHCOCH}_2\text{CH}_2-$ ), 77.4 ( $\text{C}_3$ ), 80.39 ( $-\text{NHCOC}(\text{CH}_3)_2$ ), 83.89 ( $-\text{OCH}(\text{CH}_2\text{CH}_3)_2$ ), 144.32 ( $\text{C}_2$ ), 157.97 ( $-\text{NHCOCH}_2\text{CH}_2-$ ), 166.15 ( $-\text{NH}-\text{C}(\text{O})-\text{NH}-$ ), 173.88 ( $-\text{NHCOCH}_3$ ), 176.18 ( $-\text{CH}_2-\text{C}(\text{O})\text{NH}-\text{CH}_2-$ ).

$^{31}\text{P}$  NMR (161.7 MHz, MeOH- $d_4$ )  $\delta_P$ : 19.00 (s).

HR-ESI-MS ( $m/z$ ) calculated for  $\text{C}_{62}\text{H}_{115}\text{N}_6\text{O}_{22}\text{PS}$   $[\text{M}+\text{Na}]^+$  1381.75, found 1381.7471.

## NMR-Spectra

### <sup>1</sup>H-NMR Spectrum Compound 1

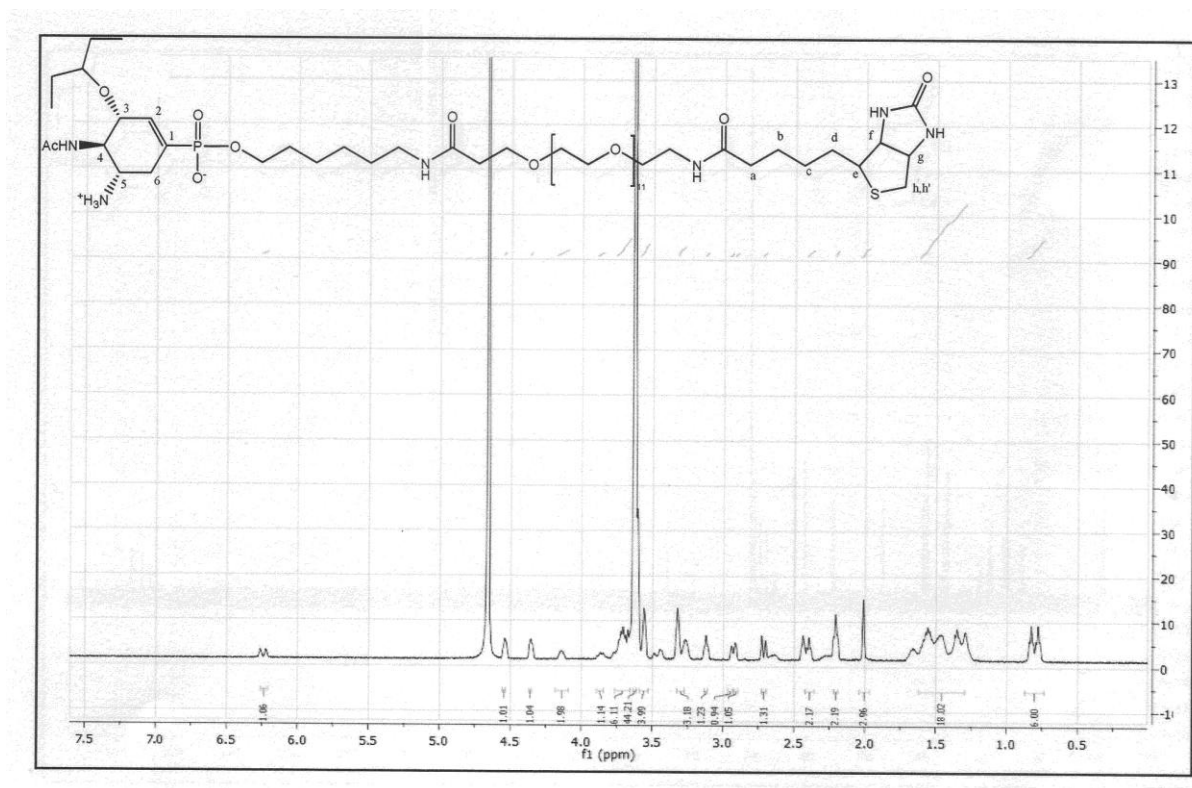

### <sup>13</sup>C-NMR Spectrum Compound 1

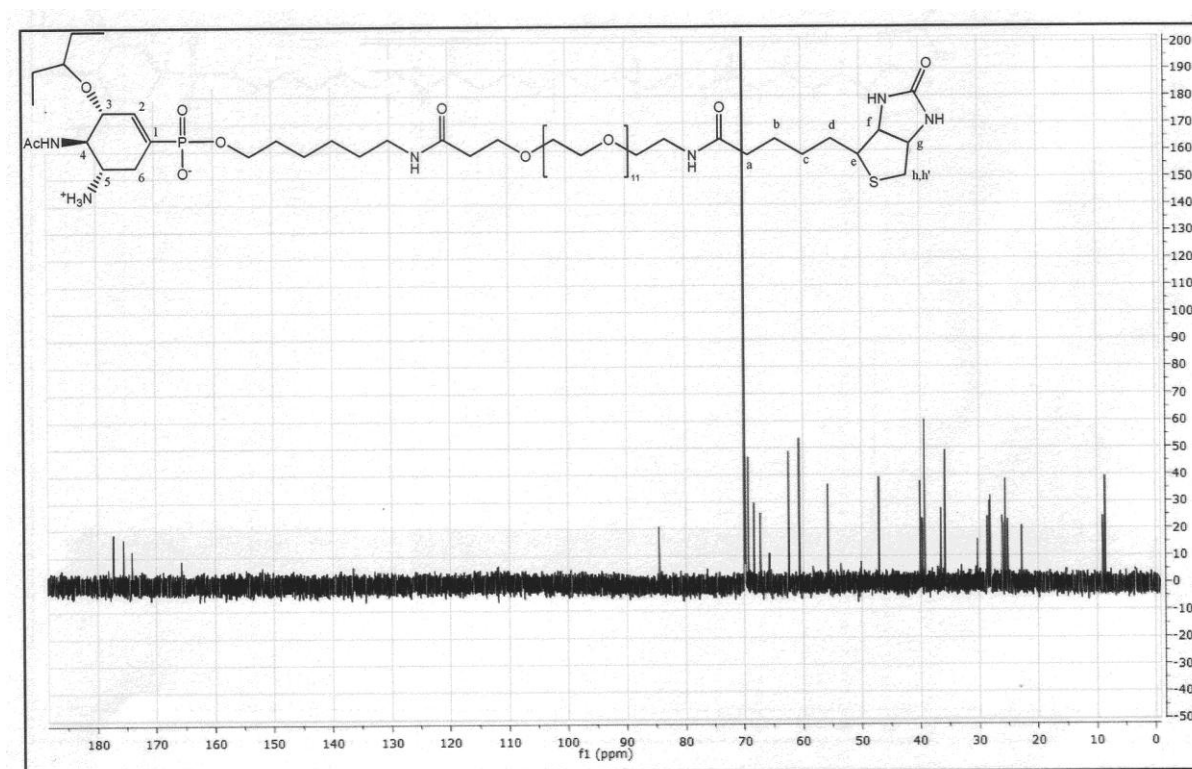

### **<sup>31</sup>P-NMR Spectrum Compound 1**

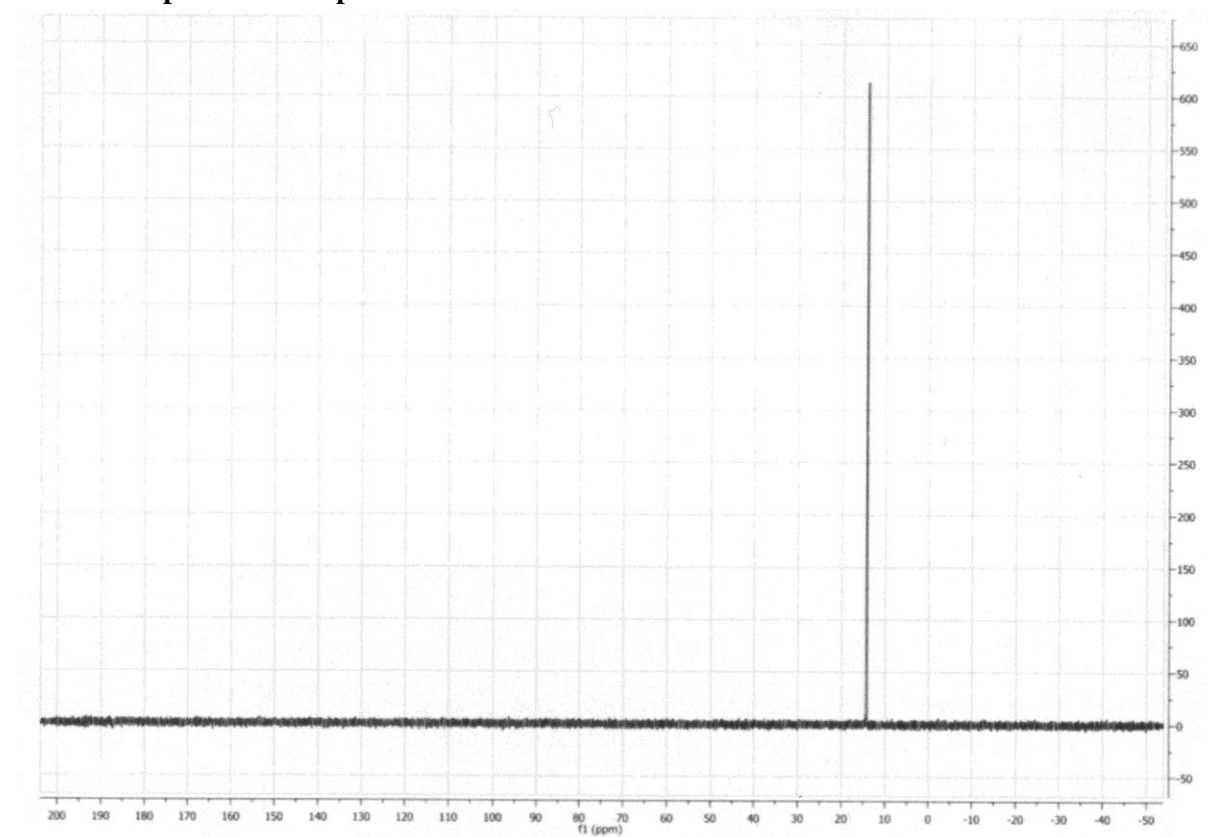

### **<sup>1</sup>H-NMR Spectrum Compound 4**

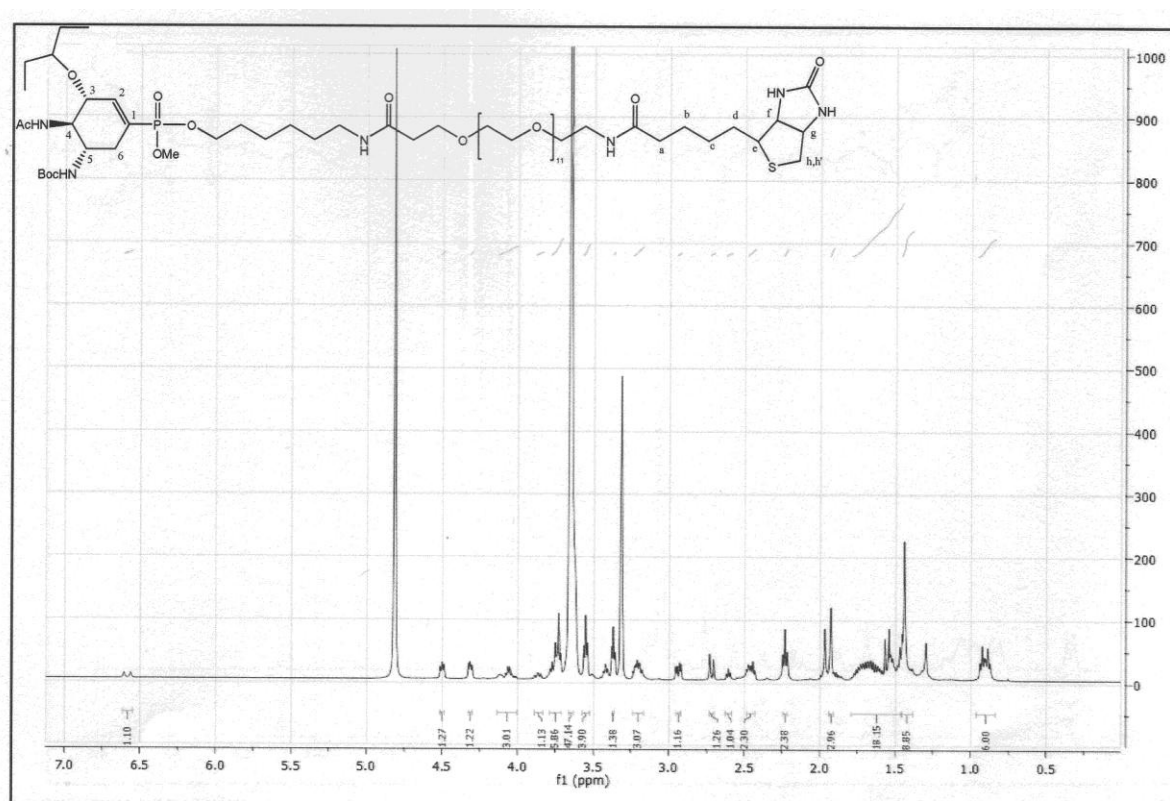

### 13C-NMR Spectrum Compound 4

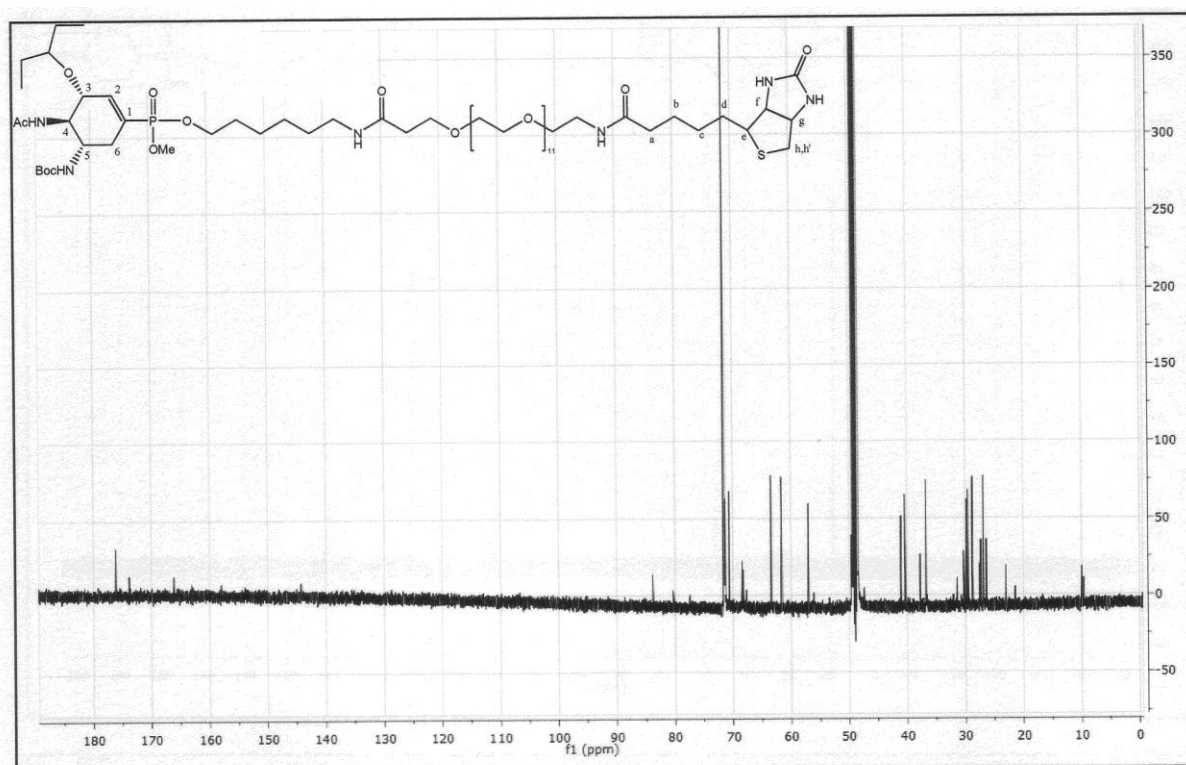

### 31P-NMR Spectrum Compound 4

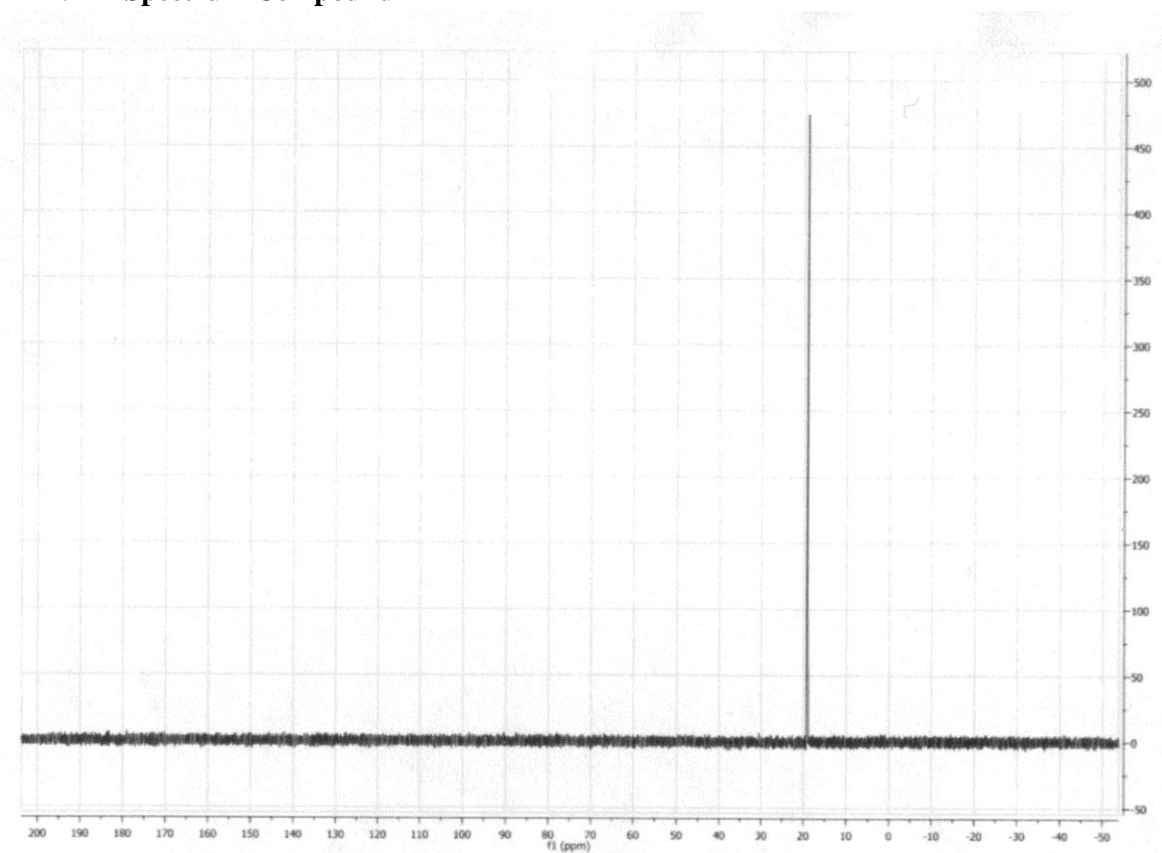

Supplement: Supplementary data — Synthetic procedures and analytical data for compounds 1 and 4. [file mmc1.pdf]
